# Supplementary material for: Solar-Powered Photodegradation of Pollutant Dyes Using Silver-Embedded Porous TiO2 Nanofibers
Source: MDPI journal article supplement (doi:10.3390/nano11040856), 2021-03-27
Supplement: s1 [file s1]

# Solar-Powered Photodegradation of Pollutant Dyes Using Silver-Embedded Porous TiO<sub>2</sub> Nanofibers

Jerry Zhi Xiong Heng <sup>1,†</sup>, Karen Yuanting Tang <sup>1,†</sup>, Michelle D. Regulacio <sup>2</sup>, Ming Lin <sup>1,\*</sup>, Xian Jun Loh <sup>1,\*</sup>, Zibiao Li <sup>1,\*</sup> and Enyi Ye <sup>1,\*</sup>

<sup>1</sup> Institute of Materials Research and Engineering, Agency for Science, Technology and Research (A\*STAR), 2 Fusionopolis Way, Singapore 138634, Singapore; jerry\_heng\_from.tp@imre.a-star.edu.sg (J.Z.X.H.); tangytk@imre.a-star.edu.sg (K.Y.T.)

<sup>2</sup> Institute of Chemistry, University of the Philippines Diliman, Quezon City 1101, Philippines; mdregulacio@up.edu.ph

\* Correspondence: m-lin@imre.a-star.edu.sg (M.L.); lohxf@imre.a-star.edu.sg (X.J.L.); lizb@imre.a-star.edu.sg (Z.L.); yeey@imre.a-star.edu.sg (E.Y.)

† These authors contributed equally.

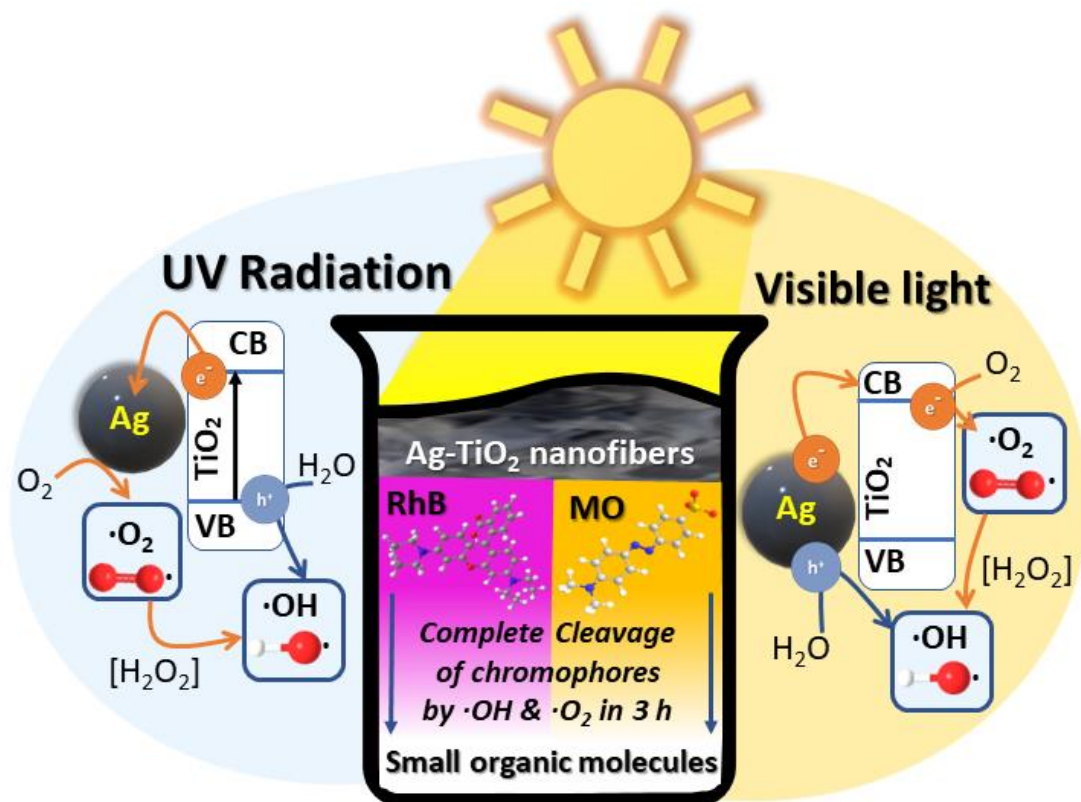

**Figure S1.** Schematic overview of the solar powered photocatalytic degradation of RhB and MO dyes with Ag-TiO<sub>2</sub> nanofibers as the photocatalyst.

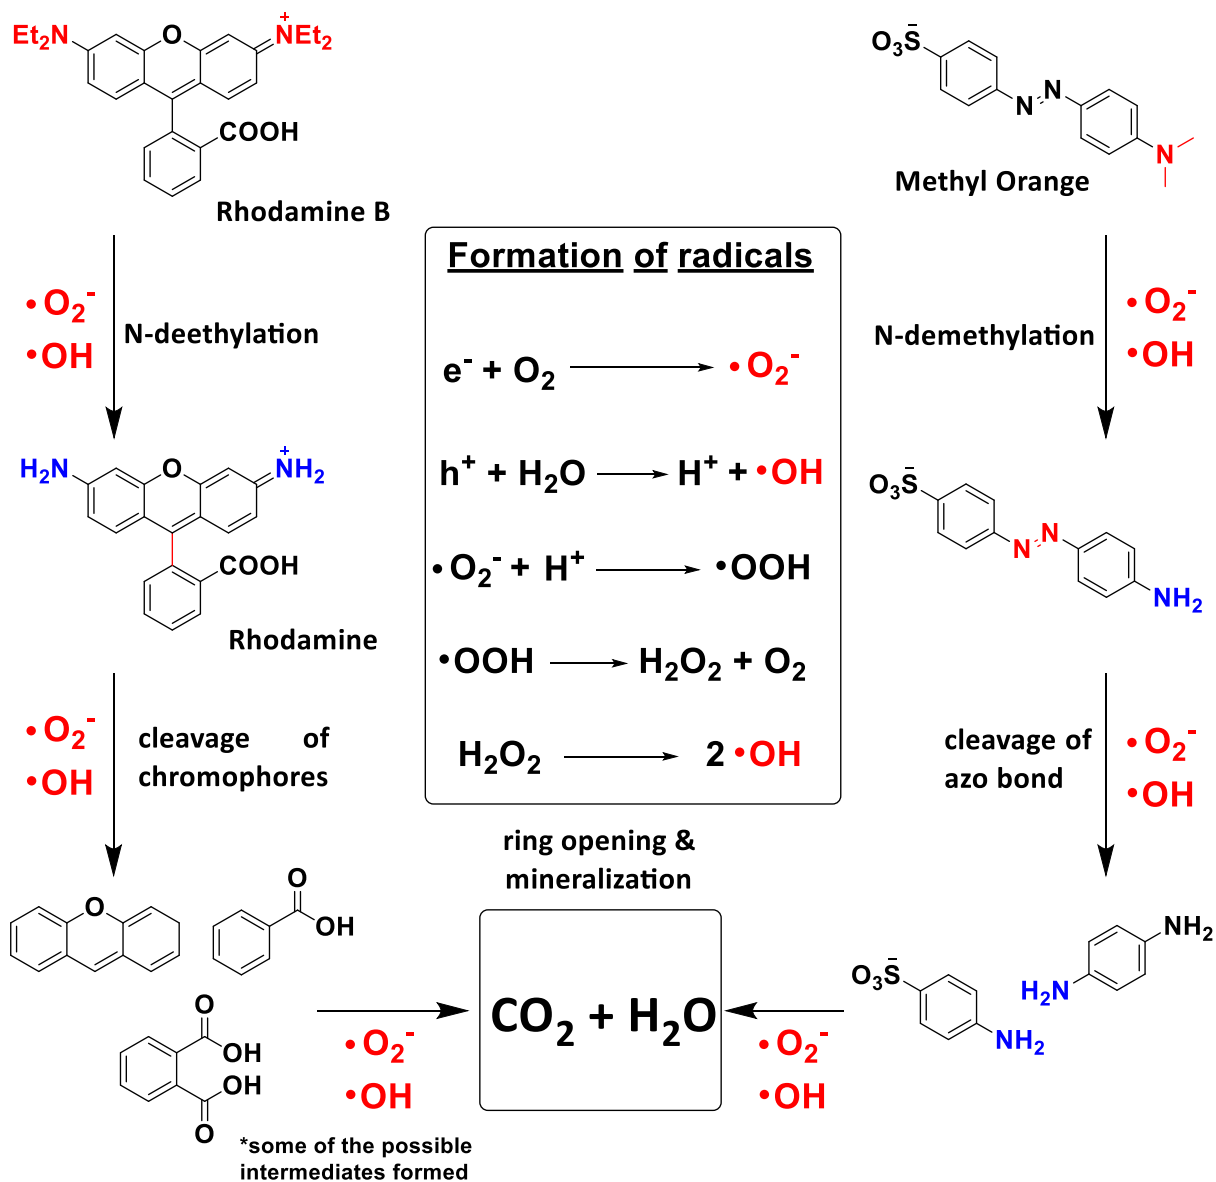

**Figure S2.** Proposed photodegradation pathway for RhB and MO dyes by  $\cdot OH$  and  $\cdot O_2^-$  radicals that were generated by electron-hole pairs in Ag-TiO<sub>2</sub> nanofibers.
